# Supplementary material for: Comparative transcriptome analysis reveals the response mechanism of Cf-16-mediated resistance to Cladosporium fulvum infection in tomato
Source: PubMed Central journal article supplement (PMC6971981; doi:10.1186/s12870-020-2245-5), 2020-01-20
Supplement: 12870_2020_2245_MOESM9_ESM.pdf [file 12870_2020_2245_MOESM9_ESM.pdf]

Classification of Raw Reads (Cf16\_A1)

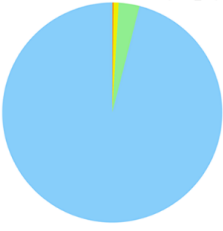

**Legend**

- 1. N (147,592; 0.21%)
- 2. Adapter (503,434; 0.72%)
- 3. Low qual (2,152,084; 3.06%)
- 4. Clean reads (67,432,940; 96.01%)

Classification of Raw Reads (Cf16\_A2)

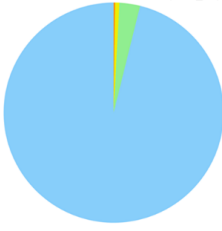

**Legend**

- 1. N (152,874; 0.21%)
- 2. Adapter (455,212; 0.63%)
- 3. Low qual (2,207,292; 3.03%)
- 4. Clean reads (69,928,960; 96.13%)

Classification of Raw Reads (Cf16\_A3)

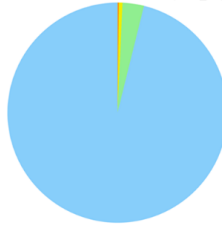

**Legend**

- 1. N (147,682; 0.21%)
- 2. Adapter (365,776; 0.51%)
- 3. Low qual (2,210,502; 3.15%)
- 4. Clean reads (67,517,012; 96.13%)

Classification of Raw Reads (Cf16\_B1)

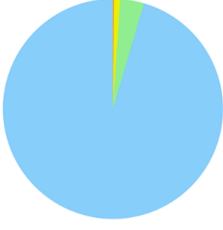

**Legend**

- 1. N (120,510; 0.17%)
- 2. Adapter (659,782; 0.86%)
- 3. Low qual (2,652,986; 3.53%)
- 4. Clean reads (71,822,604; 95.44%)

Classification of Raw Reads (Cf16\_B2)

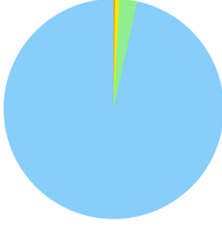

**Legend**

- 1. N (149,316; 0.2%)
- 2. Adapter (475,568; 0.63%)
- 3. Low qual (1,983,928; 2.64%)
- 4. Clean reads (72,643,008; 96.53%)

Classification of Raw Reads (Cf16\_B3)

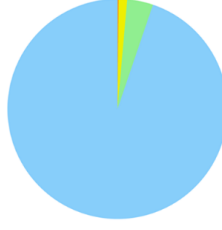

**Legend**

- 1. N (121,344; 0.17%)
- 2. Adapter (902,010; 1.24%)
- 3. Low qual (2,774,474; 3.81%)
- 4. Clean reads (68,946,306; 94.78%)

Classification of Raw Reads (CK\_Cf16\_A1)

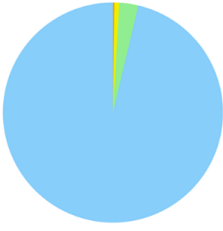

**Legend**

- 1. N (120,510; 0.21%)
- 2. Adapter (504,686; 0.72%)
- 3. Low qual (1,352,800; 2.78%)
- 4. Clean reads (67,631,100; 96.29%)

Classification of Raw Reads (CK\_Cf16\_A2)

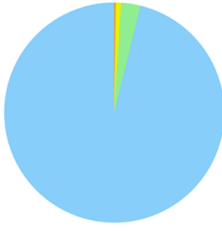

**Legend**

- 1. N (148,820; 0.2%)
- 2. Adapter (567,218; 0.78%)
- 3. Low qual (2,087,668; 2.87%)
- 4. Clean reads (69,940,352; 96.15%)

Classification of Raw Reads (CK\_Cf16\_A3)

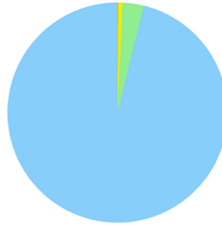

**Legend**

- 1. N (68,446; 0.09%)
- 2. Adapter (459,610; 0.63%)
- 3. Low qual (2,270,818; 3.12%)
- 4. Clean reads (69,945,270; 96.15%)

Classification of Raw Reads (CK\_Cf16\_B1)

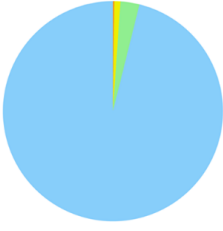

**Legend**

- 1. N (139,332; 0.2%)
- 2. Adapter (823,868; 0.89%)
- 3. Low qual (1,963,758; 2.8%)
- 4. Clean reads (67,508,372; 96.12%)

Classification of Raw Reads (CK\_Cf16\_B2)

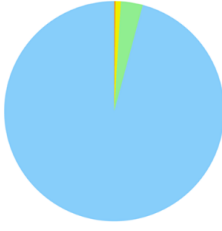

**Legend**

- 1. N (124,600; 0.17%)
- 2. Adapter (569,390; 0.78%)
- 3. Low qual (2,349,754; 3.23%)
- 4. Clean reads (69,700,418; 95.82%)

Classification of Raw Reads (CK\_Cf16\_B3)

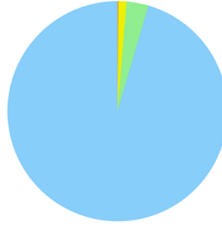

**Legend**

- 1. N (111,996; 0.16%)
- 2. Adapter (813,844; 1.16%)
- 3. Low qual (2,251,916; 3.21%)
- 4. Clean reads (67,057,922; 95.48%)

Classification of Raw Reads (CK\_MM\_A1)

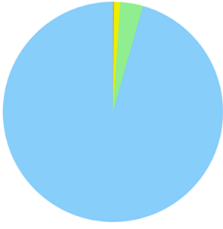

**Legend**

- 1. N (118,358; 0.16%)
- 2. Adapter (648,496; 0.89%)
- 3. Low qual (2,429,798; 3.34%)
- 4. Clean reads (69,547,562; 95.61%)

Classification of Raw Reads (CK\_MM\_A2)

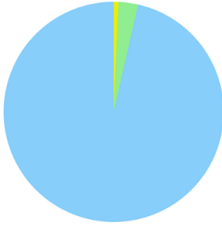

**Legend**

- 1. N (7,704; 0.01%)
- 2. Adapter (489,708; 0.67%)
- 3. Low qual (2,100,266; 2.89%)
- 4. Clean reads (70,146,500; 96.43%)

Classification of Raw Reads (CK\_MM\_A3)

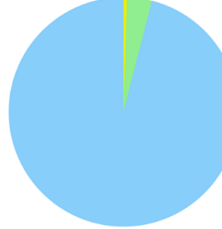

**Legend**

- 1. N (7,082; 0.01%)
- 2. Adapter (339,446; 0.48%)
- 3. Low qual (2,465,990; 3.51%)
- 4. Clean reads (67,423,712; 96%)

Classification of Raw Reads (CK\_MM\_B1)

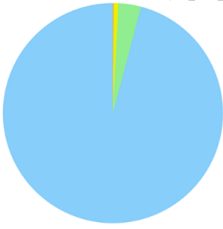

**Legend**

- 1. N (64,544; 0.1%)
- 2. Adapter (463,250; 0.69%)
- 3. Low qual (2,222,512; 3.32%)
- 4. Clean reads (64,146,990; 95.89%)

Classification of Raw Reads (CK\_MM\_B2)

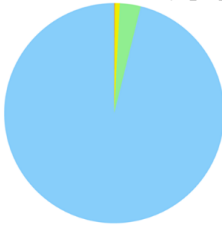

**Legend**

- 1. N (70,082; 0.1%)
- 2. Adapter (480,340; 0.71%)
- 3. Low qual (2,077,780; 3.07%)
- 4. Clean reads (65,099,140; 96.12%)

Classification of Raw Reads (CK\_MM\_B3)

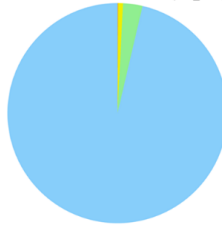

**Legend**

- 1. N (73,190; 0.1%)
- 2. Adapter (505,356; 0.69%)
- 3. Low qual (2,083,332; 2.86%)
- 4. Clean reads (70,082,166; 96.34%)

**Fig. S1 Classification of raw reads of different samples.**
