# Supplementary material for: Comparative transcriptome analysis reveals the response mechanism of Cf-16-mediated resistance to Cladosporium fulvum infection in tomato
Source: PubMed Central journal article supplement (PMC6971981; doi:10.1186/s12870-020-2245-5), 2020-01-20
Supplement: 12870_2020_2245_MOESM10_ESM.pdf [file 12870_2020_2245_MOESM10_ESM.pdf]

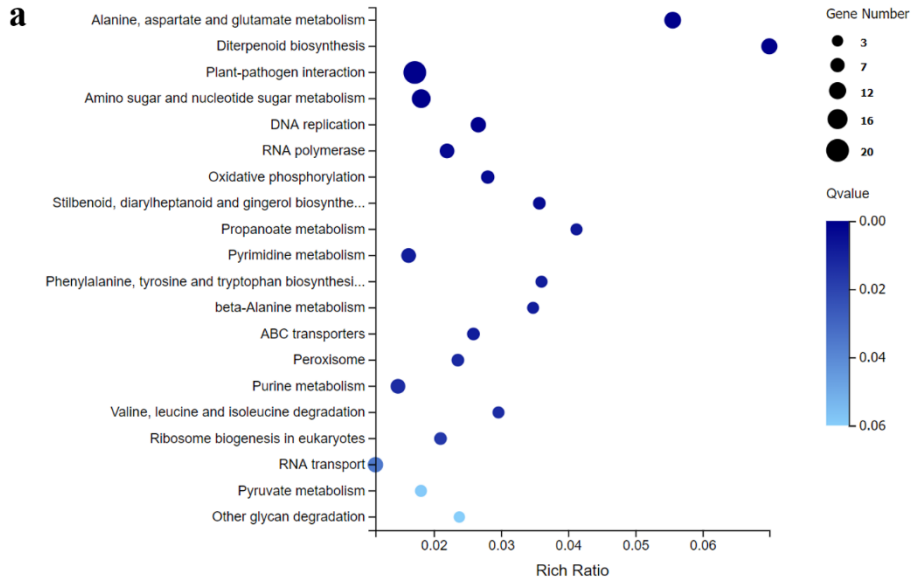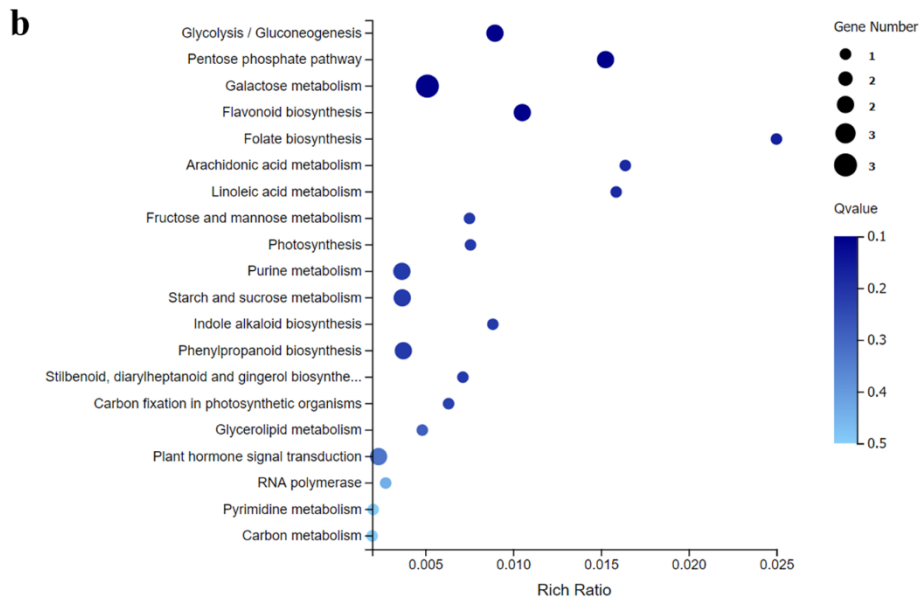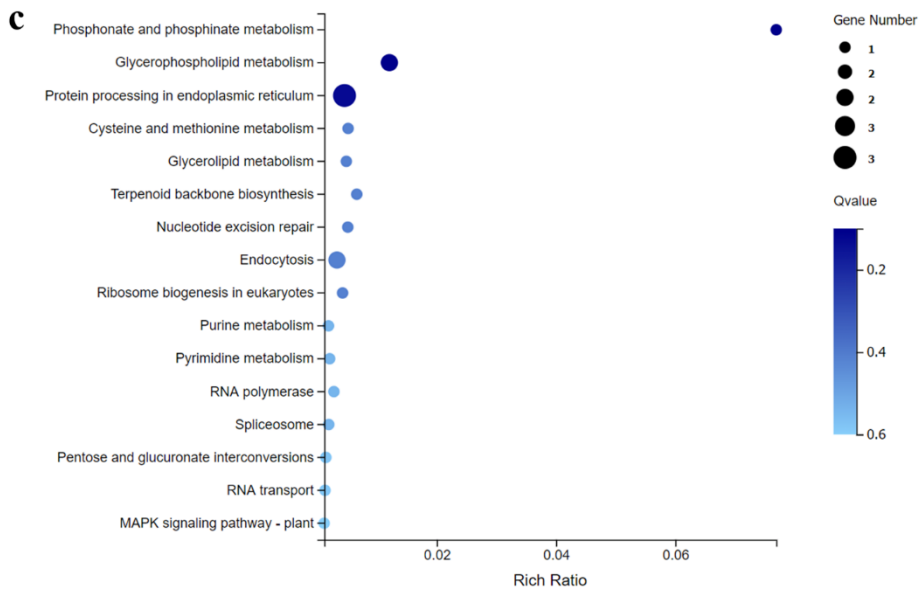

**Fig. S2 Scatter plot of the KEGG pathway enrichment of the three modules from WGCNA. a: KEGG pathways based on the MEred module. b: KEGG pathways based on the MEgreenyellow module. c: KEGG pathways based on the MEpurple module.**
